# Supplementary material for: Solar energy driven C–C bond cleavage in a lignin model compound with a D–π–A organic dye-sensitized photoanode
Source: Royal Society of Chemistry journal article supplement (doi:10.1039/d3se00194f), 2023-01-01
Supplement: d3se00194f1.pdf [file d3se00194f1.pdf]

Electronic Supplementary Information

# Solar Energy Driven C–C Bond Cleavage in a Lignin Model Compound with a D– $\pi$ –A Organic Dye-Sensitized Photoanode

Saerona Kim,<sup>1#</sup> Hyeong Cheol Kang,<sup>2#</sup> Chun Chu,<sup>3</sup> Shuya Li,<sup>1</sup> Kicheon Yoo,<sup>2</sup>  
Udani Kaushalya Wijethunga,<sup>1</sup> Weiwei Zheng,<sup>3</sup> Chang Geun Yoo,<sup>4,5</sup> Benjamin D. Sherman,<sup>6</sup>  
Jae-Joon Lee,<sup>2\*</sup> Gyu Leem,<sup>1,5\*</sup>

<sup>1</sup>Department of Chemistry, State University of New York College of Environmental Science and Forestry, Syracuse, New York 13210, United States

<sup>2</sup>Department of Energy and Materials Engineering, Research Center for Photoenergy Harvesting & Conversion Technology (*phct*), Dongguk University, Seoul 04620, Republic of Korea

<sup>3</sup>Department of Chemistry, Syracuse University, Syracuse, New York 13244, United States

<sup>4</sup>Department of Chemical Engineering, State University of New York College of Environmental Science and Forestry, Syracuse, New York 13210, United States

<sup>5</sup>The Michael M. Szwarc Polymer Research Institute, 1 Forestry Drive, Syracuse, New York 13210, United States

<sup>6</sup>Department of Chemistry and Biochemistry, College of Science and Engineering, Texas Christian University, Fort Worth, Texas 76129, United States

\*Corresponding authors: jjlee@dongguk.edu and gyleem@esf.edu

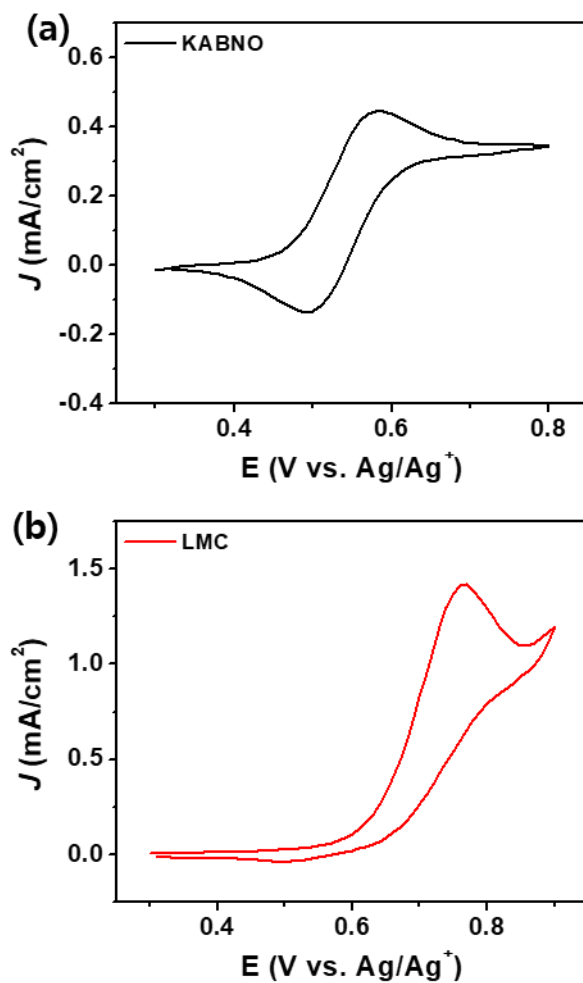

**Fig. S1** CVs of (a) 3 mM **KABNO**, and (b) 3 mM **LMC** in 0.1 M TBAPF<sub>6</sub> acetonitrile. The experiment was performed using a glassy carbon working electrode, Pt counter electrode, and Ag/Ag<sup>+</sup> reference electrode in the dark.

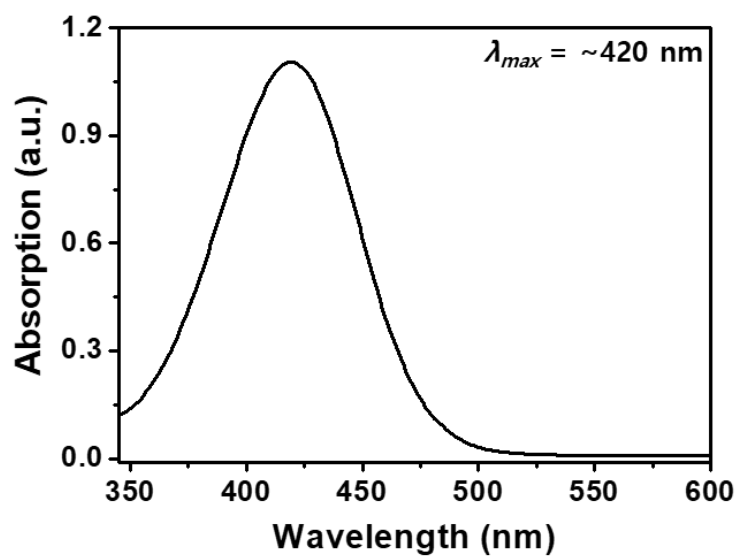

**Fig. S2** UV-vis absorption of **DPTC** in ethanol solution.

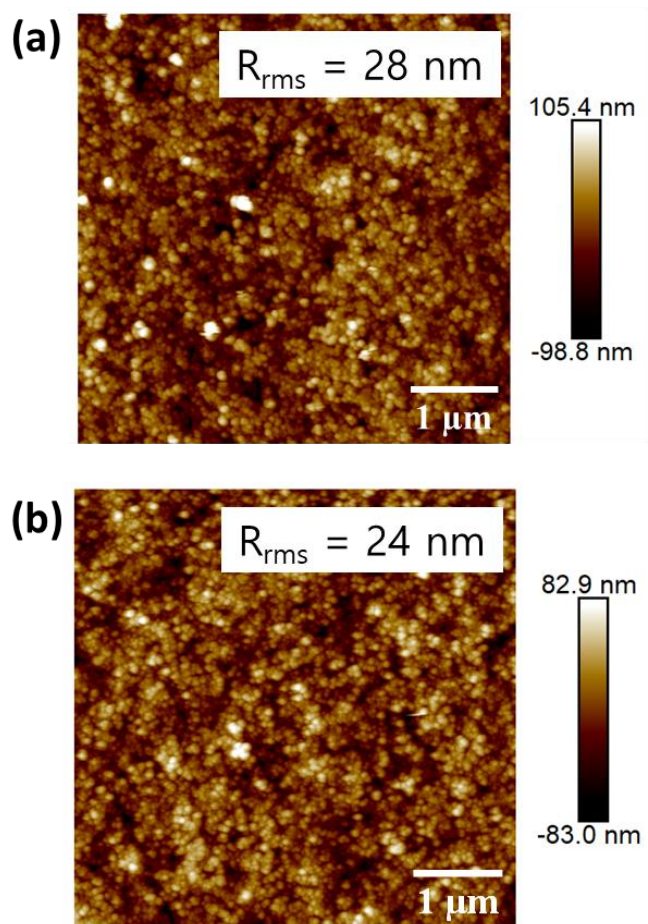

**Fig. S3** AFM images of (a) bare FTO/TiO<sub>2</sub> and (b) FTO/TiO<sub>2</sub>/DPTC. (Inset:  $R_{\text{rms}}$  is root mean square.)

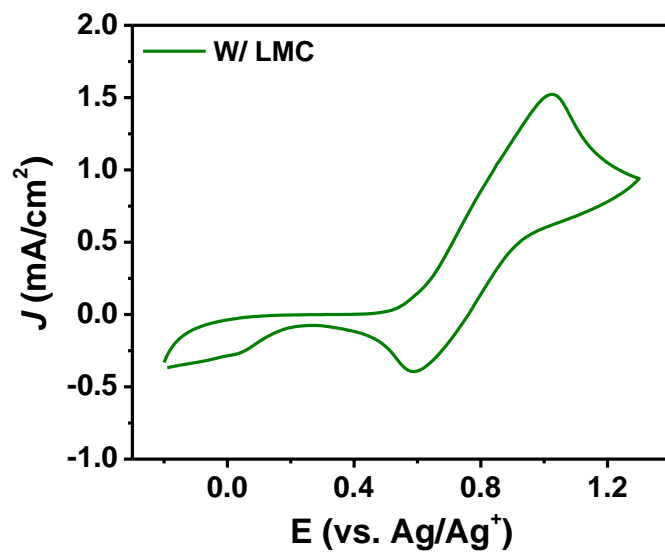

**Fig. S4** CV of FTO/TiO<sub>2</sub>/DPTC with 3 mM LMC in 0.1 M TBAPF<sub>6</sub> acetonitrile.

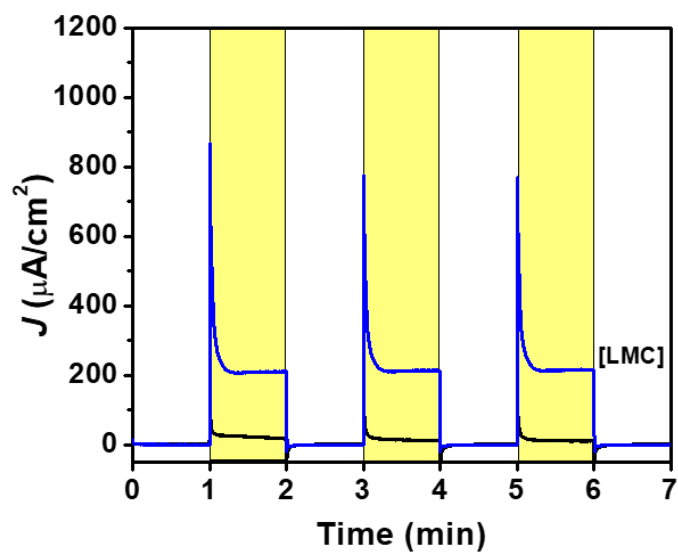

**Fig. S5** Photocurrent-time traces of FTO/TiO<sub>2</sub>/DPTC without (black) and with 3.0 mM **LMC** (blue).

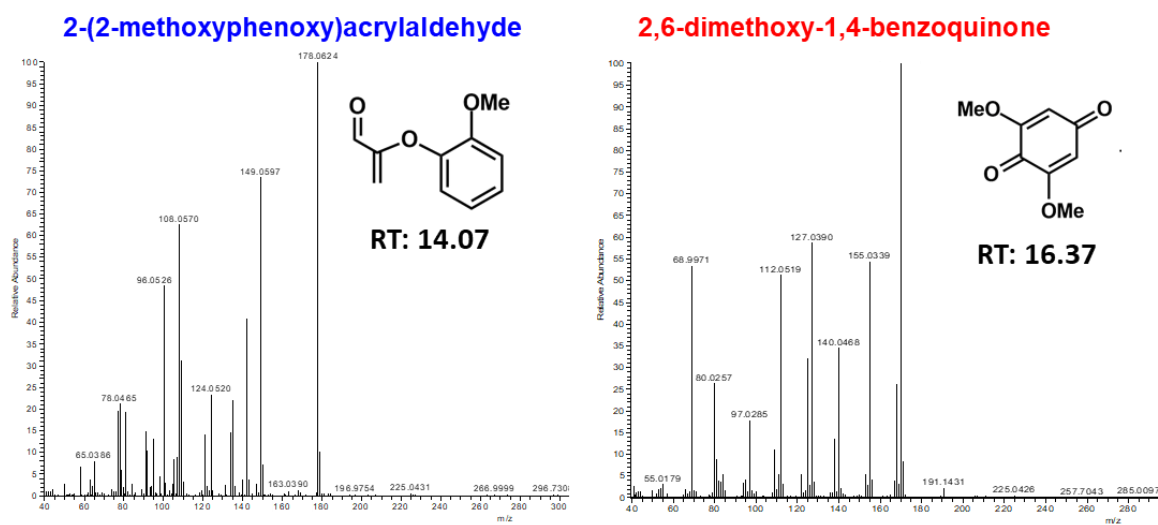

**Fig. S6** Gas chromatography-mass spectra of **A** and **B** products after 24 h illumination.

The detailed  $^1\text{H}/^{13}\text{C}$  NMR information of products A and B is provided. These peak assignments are consistent with the cleavage products from the previous studies.<sup>1,2</sup>

**Product A (Blue):** 2-(2-methoxyphenoxy)acrylaldehyde.  $^1\text{H}$ -NMR:  $\delta$  9.46 (s, 1H), 7.20-6.93 (m, 4H, aryl), 5.27 (d,  $J = 2.8$  Hz, 1H), 5.08 (d,  $J = 2.8$  Hz, 1H), 3.83 (s, 3H).  $^{13}\text{C}$ -NMR:  $\delta$  186.98 (s), 158.20 (s), 151.17 (s), 142.85 (s), 126.28 (s), 122.11 (s), 121.21 (s), 113.13 (s), 107.26 (s), 55.89 (s).

**Product B (Red):** 2,6-dimethoxy-1,4-benzoquinone.  $^1\text{H}$ -NMR:  $\delta$  5.87 (s, 2H), 3.83 (s, 6H).  $^{13}\text{C}$ -NMR:  $\delta$  186.84 (s), 176.64 (s), 157.36 (s), 107.41 (s), 56.46 (s).

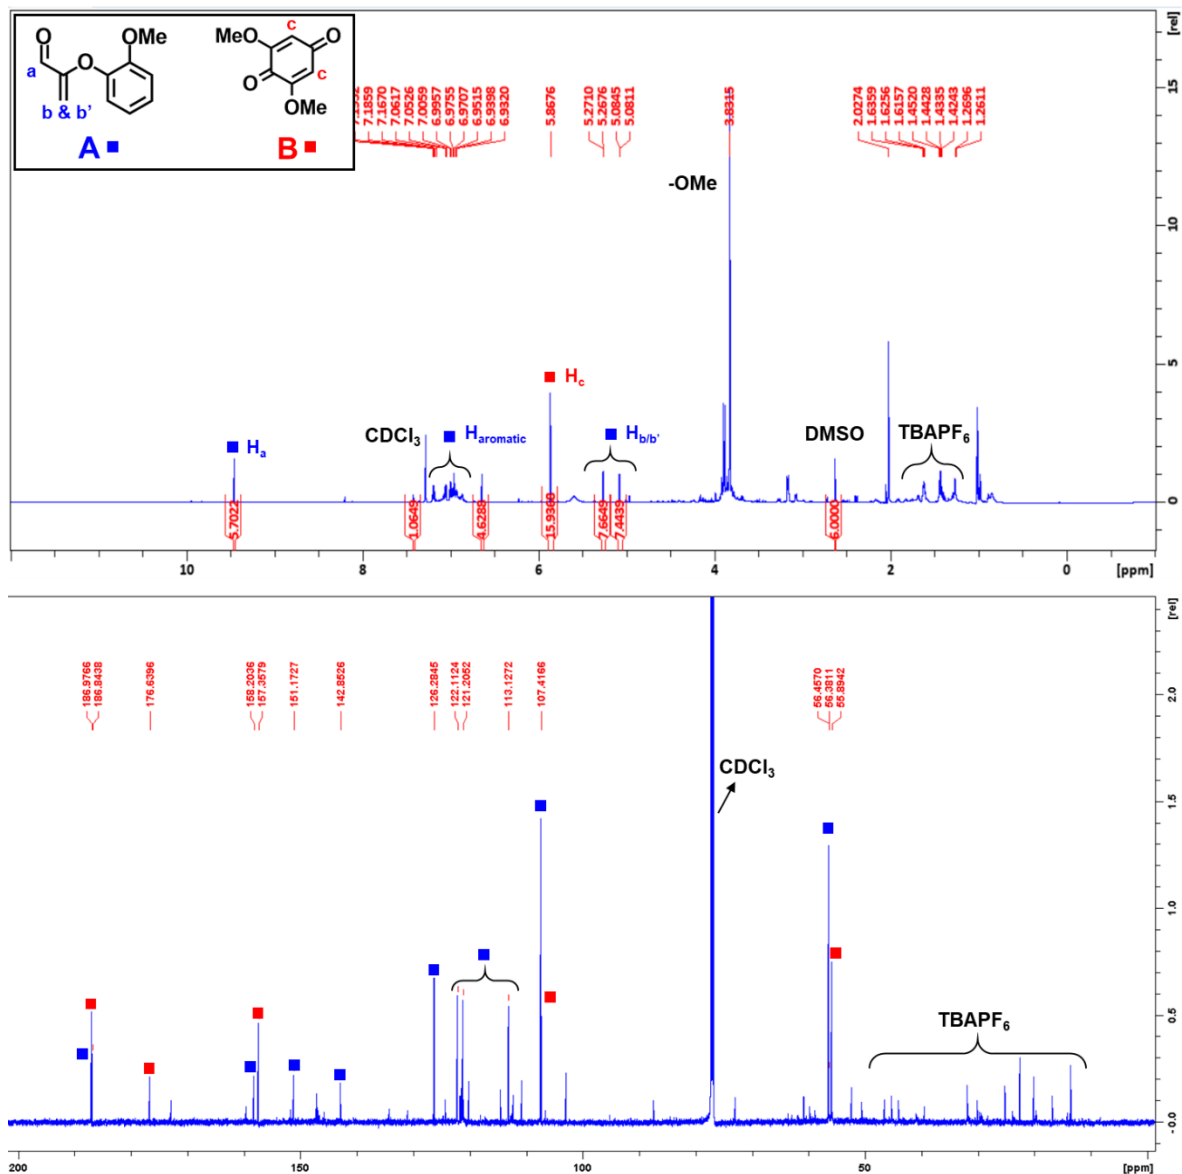

**Fig. S7**  $^1\text{H}$ -NMR (top) and  $^{13}\text{C}$ -NMR (bottom) of reaction solution after 24 h illumination with DMSO as an internal standard.

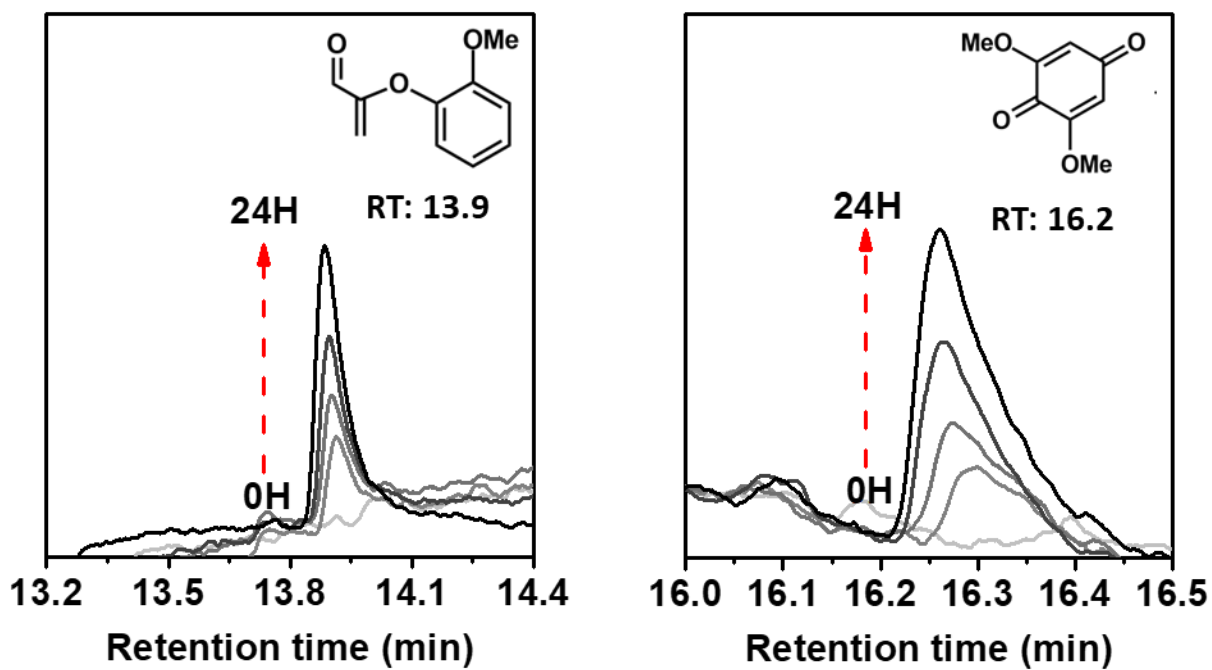

**Fig. S8** GC-FID of cleavage products **A** and **B** in a DSPEC after 24 h illumination.

### (a) Aliphatic Region

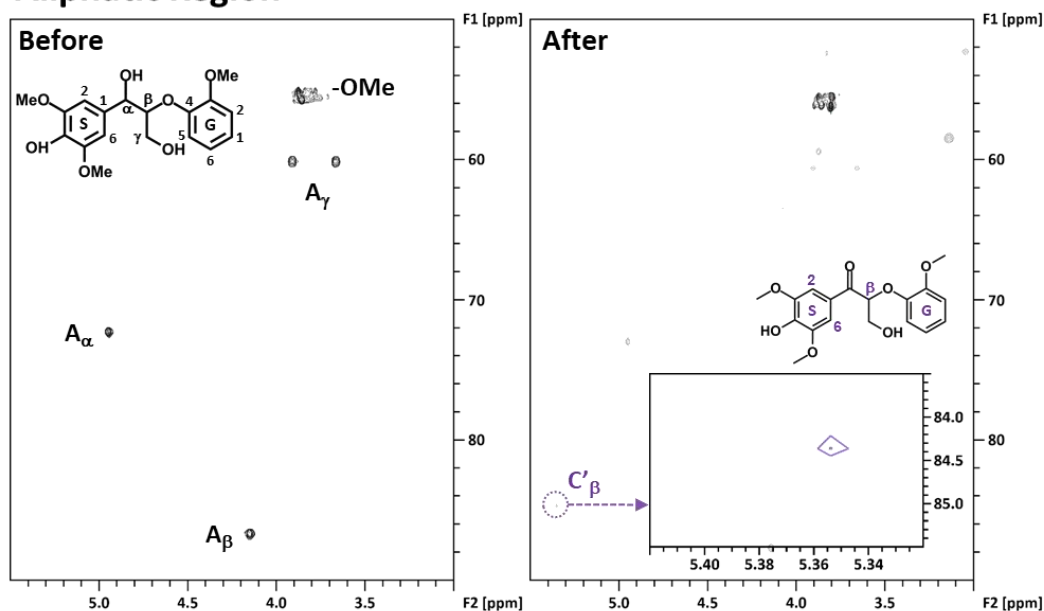

### (b) Aromatic Region

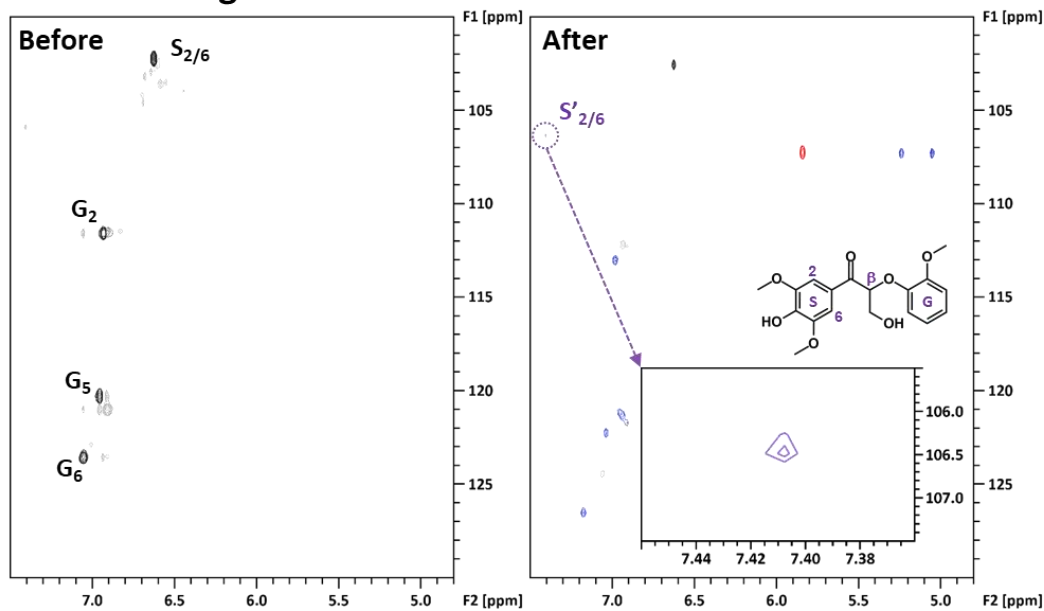

**Fig. S9** 2D HSQC NMR spectra of the oxidized **LMC** before (left) and after (right) the photoelectrolysis reaction: (a) aliphatic and (b) aromatic region.

## References

1. S. Li, S. Kim, A. H. Davis, J. Zhuang, E. W. Shuler, D. Willinger, J.-J. Lee, W. Zheng, B. D. Sherman, C. G. Yoo and G. Leem, *ACS Catal.*, 2021, **11**, 3771–3781.
2. Y.-Y. Jiang, L. Yan, H.-Z. Yu, Q. Zhang, and Y. Fu, *ACS Catal.* 2016, **6**, 4399–4410.
